# Supplementary material for: Investigation of PRDM10 and PRDM13 Expression in Developing Mouse Embryos by an Optimized PACT-Based Embryo Clearing Method
Source: MDPI journal article supplement (doi:10.3390/ijms22062892), 2021-03-12
Supplement: s1 [file s1]

**Table S1. Antibodies and dyes used in this study.**

|          | <b>Antibody and dye</b>                                               | <b>Marking target</b> | <b>Company</b>      | <b>Cat No.</b> | <b>Ratio</b> |
|----------|-----------------------------------------------------------------------|-----------------------|---------------------|----------------|--------------|
| <b>1</b> | PRDM10 rabbit antibody                                                | Prdm10                | Biorbyt             | orb312613      | 1:100        |
| <b>2</b> | PRDM13 rabbit antibody                                                | Prdm13                | Biorbyt             | orb312614      | 1:100        |
| <b>3</b> | Goat anti-rabbit IgG H&L (Alexa Fluor® 488)                           |                       | Abcam               | ab150077       | 1:100        |
| <b>4</b> | DyLight 594 labeled Lycopersicon Esculentum (Tomato) Lectin (LEL, TL) | Blood vessel          | Vector laboratories | DL-1177        | -            |
| <b>5</b> | DAPI Hoechst 33342                                                    | Nuclear               | Invitrogen          | R37605         | -            |

**Table S2. An outline of PRDM10 and PRDM13 mouse embryonic expression.**

|                             |              | <b>PRDM10</b>                                                                                                                               | <b>PRDM13</b>                                                                                                                               |
|-----------------------------|--------------|---------------------------------------------------------------------------------------------------------------------------------------------|---------------------------------------------------------------------------------------------------------------------------------------------|
| <b>Mouse embryonic date</b> | <b>E9.5</b>  | Craniofacial structures<br>Somites<br>Notochord<br>Telencephalon<br>Tegmentum<br>Cerebellum<br>Midbrain<br>Dorsal root ganglia<br>Hindbrain | Craniofacial structures<br>Somites<br>Notochord<br>Telencephalon<br>Tegmentum<br>Cerebellum<br>Midbrain<br>Dorsal root ganglia<br>Hindbrain |
|                             | <b>E10.5</b> | Craniofacial structures<br>Brain<br>Somites<br>Heart<br>Tegmentum<br>Spinal cord<br>Spinal ganglia                                          | Craniofacial structures<br>Brain<br>Somites<br>Heart<br>Tegmentum<br>Spinal cord<br>Spinal ganglia                                          |
|                             | <b>E13.5</b> | Brain<br>Spinal cord<br>Skeletal cartilage<br>Ventricle<br>Tongue<br>Olfactory epithelium<br>Umbilical cord                                 | Brain<br>Spinal cord<br>Skeletal cartilage<br>Lung<br>Olfactory epithelium<br>Eye                                                           |

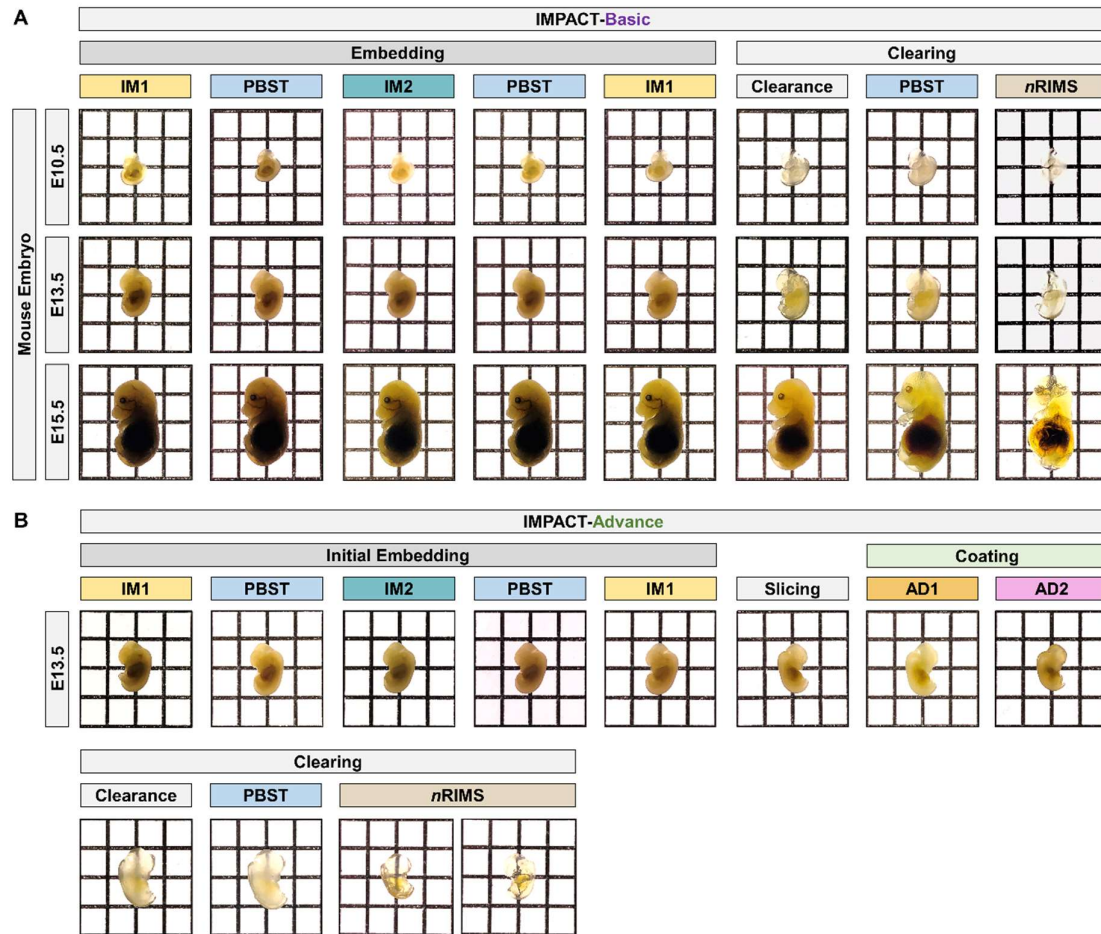

**Figure S1. Comparison of optical transparency achieved in mouse embryos processed via IMPACT-Basic and IMPACT-Advance.**

Comparison of optical transparency achieved in E9.5, E10.5, E13.5 and E15.5 mouse processed via IMPACT-Basic (**A**) and IMPACT-Advance (**B**). The transparency of all cleared samples was assessed against a patterned background (length:width=5-mm:5-mm).

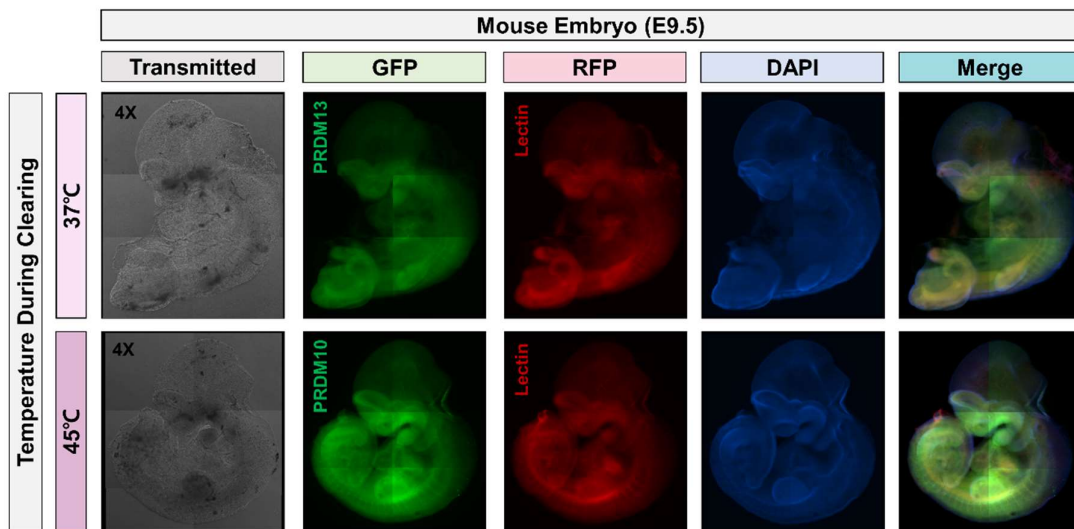

**Figure S2. Fluorescence images in E9.5 mouse embryos via IMPACT-Basic.**

Comparison of additional fluorescence images in E9.5 mouse embryos achieved by clearing at 37°C and 45°C using IMPACT-Basic. The whole image of each sample was created using fluorescent microscopy, and the microscope was focused on  $2 \times 3$  panels (horizontal  $\times$  vertical). Merged images with PRDM10 and PRDM13 in green, lectin in red, and DAPI in blue.

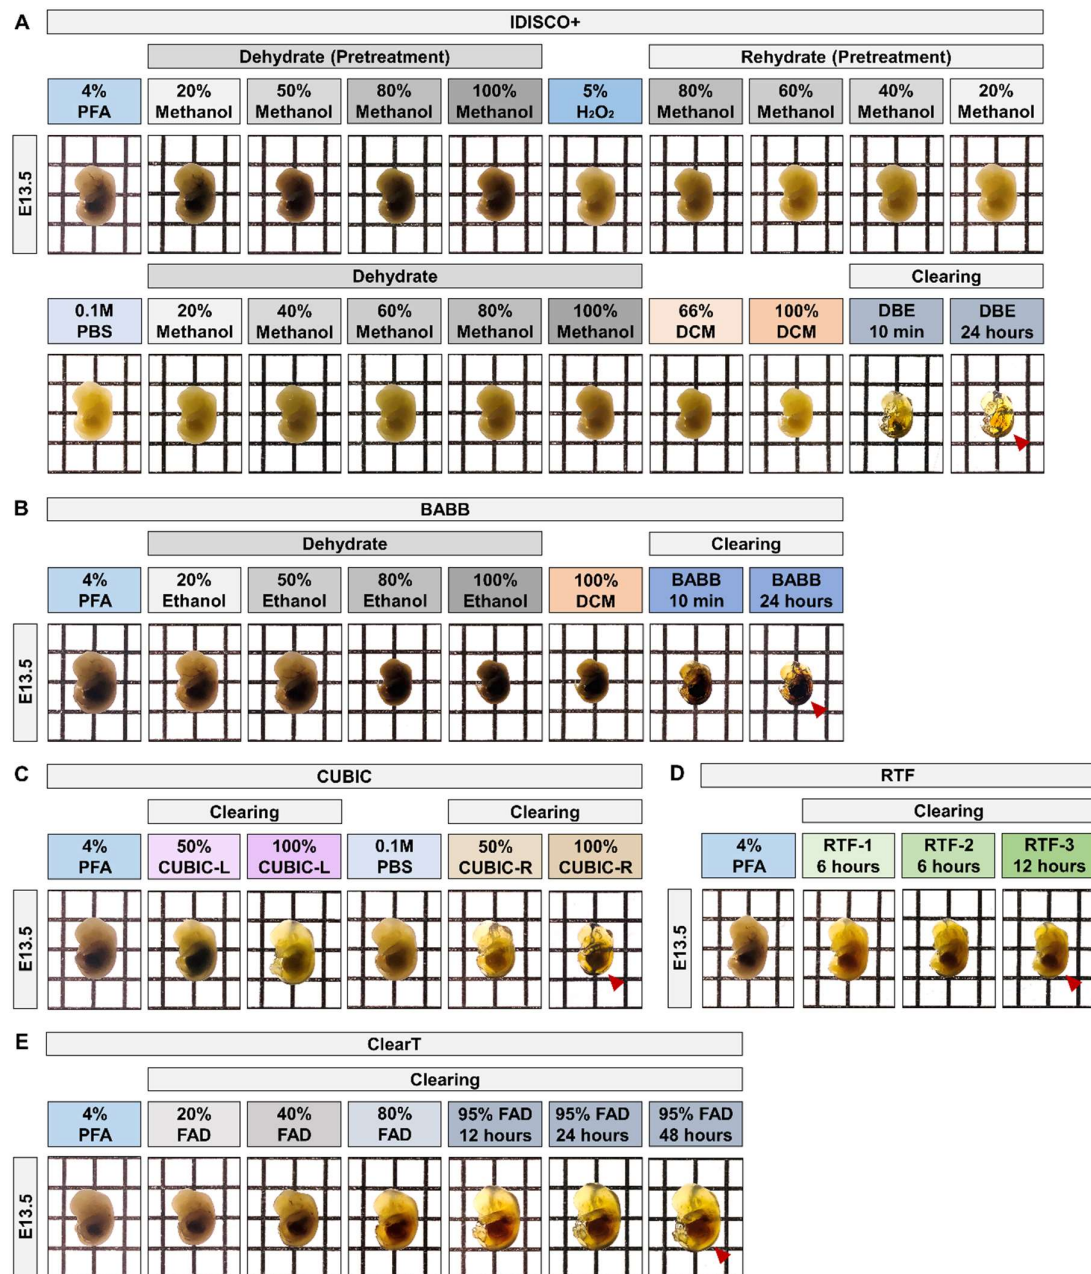

**Figure S3. Comparison of optical transparency in E13.5 mouse embryos achieved by iDISCO+, BABB, CUBIC, RTF and Clear<sup>T</sup>.**

Comparison of optical transparency achieved in E13.5 processed via iDISCO+ (A), BABB (B), CUBIC (C), RTF (D) and Clear<sup>T</sup> (E). The transparency of all cleared samples was assessed against a patterned background (length:width=5-mm:5-mm). Red arrows point to areas of opaque heart and liver.

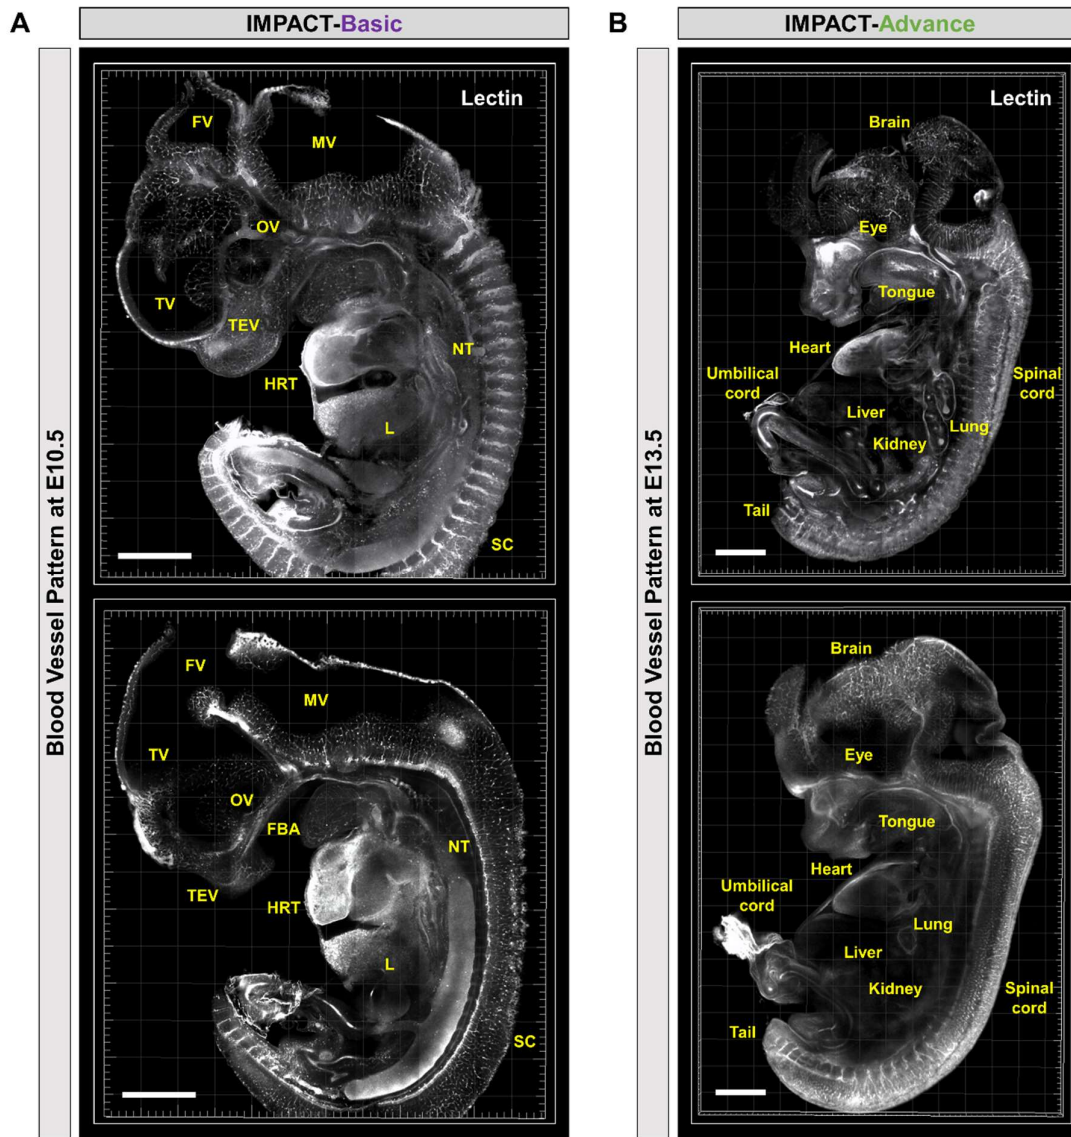

**Figure S4. Blood vessel imaging in mouse embryos at E10.5 and E13.5.**

Lectin immunostaining in E10.5 (**A**) and E13.5 (**B**) mouse embryos processed via IMPACT-Basic and IMPACT-Advance. FBA = first branchial arch; FV = fourth ventricle; HRT = heart; MV = mesencephalic vesicle; SC = spinal cord; NT = neural tube; TEV = telencephalic vesicle; TV = third ventricle; T = tegmentum; FL = fore limb; L = liver. Scale bar (white: 1000- $\mu$ m).

**Video S1.** Three-dimensional images of PRDM10 immunostaining in a cleared E9.5 mouse embryo.

**Video S2.** Three-dimensional images of PRDM13 immunostaining in a cleared E9.5 mouse embryo.

**Video S3.** Three-dimensional images of PRDM10 immunostaining in focused midbrain in a cleared E13.5 mouse embryo.
